# Supplementary material
Source: PubMed Central journal article supplement (PMC8291101)
Supplement: NIHMS1586141-supplement-Appendix.pdf [file NIHMS1586141-supplement-Appendix.pdf]

## Supplementary Appendix

This appendix has been provided by the authors to give readers additional information about their work.

Supplement to: The All of Us Research Program Investigators. The “All of Us” research program. *N Engl J Med* 2019;381:668-76. DOI: 10.1056/NEJMSr1809937

## Supplemental Materials

### Table of Contents

|                                                                                                          |    |
|----------------------------------------------------------------------------------------------------------|----|
| The All of Us Research Program Investigators .....                                                       | 2  |
| Funding sources .....                                                                                    | 6  |
| Table S1: Estimated baseline prevalences and incidences of disease conditions in one million people..... | 7  |
| Table S2: List of Healthcare Provider Organizations as of 2019.....                                      | 8  |
| Table S3: Initial sample collection protocols. ....                                                      | 10 |

## The *All of Us* Research Program Investigators

**Writing Committee:** Joshua C Denny<sup>1</sup>; Joni L Rutter<sup>2</sup>; David B Goldstein<sup>3</sup>; Anthony Philippakakis<sup>4</sup>; Jordan W Smoller<sup>5</sup>; Gwynne Jenkins<sup>2</sup>; Eric Dishman<sup>2</sup>

**Steering Committee:** *Co-Chairs:* Joshua C Denny<sup>1</sup>; Stephanie Devaney<sup>2</sup>; Joni L Rutter<sup>2</sup>; *Committee Members:* Eric Boerwinkle<sup>6</sup>; Murray Brilliant<sup>7</sup>; Patricia Butts<sup>8</sup>; Michael Castro<sup>9</sup>; John Chaffins<sup>10</sup>; Katherine Chang<sup>9</sup>; Veena Channamsetty<sup>11</sup>; Carmen Chinae<sup>12</sup>; Alyssa Cotler<sup>2</sup>; Martha Daviglus<sup>13</sup>; Adolph Falcón<sup>14</sup>; Gretchen Funk<sup>15</sup>; Stacey Gabriel<sup>4</sup>; Kelly Gebo<sup>2</sup>; Edgar Gil Rico<sup>14</sup>; David Glazer<sup>16</sup>; David B Goldstein<sup>3</sup>; Joan M Grand<sup>17</sup>; Philip Greenland<sup>18</sup>; Kristin Hall<sup>19</sup>; Richard Hochfelder<sup>9</sup>; Praduman Jain<sup>20</sup>; Ayanna Jenkins<sup>21</sup>; Christine C. Johnson<sup>22</sup>; Parinda Khatri<sup>23</sup>; Bruce Korf<sup>24</sup>; Mitchell R Lunn<sup>25</sup>; Chris Lunt<sup>2</sup>; Patrick McGovern<sup>10</sup>; Michelle McNeely<sup>9</sup>; Steve Mikita<sup>9</sup>; Fatima Munoz<sup>26</sup>; Christopher J. O'Donnell<sup>27</sup>; Lucila Ohno-Machado<sup>28</sup>; Debbie A. Nickerson<sup>29</sup>; Akinlolu Ojo<sup>30</sup>; Fornessa Randal<sup>31</sup>; Debra Rice<sup>21</sup>; Steven E. Reis<sup>32</sup>; Dara Richardson-Heron<sup>2</sup>; Eric Schleuter<sup>33</sup>; Jordan W Smoller<sup>5</sup>; Steve Steinhubl<sup>34</sup>; Karl Surkan<sup>9</sup>; Gregory Talavera<sup>26</sup>; Ronnie Tepp<sup>35</sup>; Steve Thibodeau<sup>36</sup>; Eric Topol<sup>34</sup>; Patricia Watkins Lattimore<sup>37</sup>; David Wellis<sup>38</sup>; Consuelo H. Wilkins<sup>1</sup>; Amanda Wilson<sup>39</sup>; Joyce Winkler<sup>33</sup>; Stephan Zuchner<sup>40</sup>

***All of Us* Principal Investigators:** *Regional Medical Centers:* Brian Ahmedani<sup>22</sup>; Habib Ahsan<sup>41</sup>; Hoda Anton-Culver<sup>42</sup>; Murray Brilliant<sup>7</sup>; Elizabeth Burnside<sup>43</sup>; Olveen Carrasquillo<sup>40</sup>; Martha Daviglus<sup>13</sup>; Marc Drezner<sup>43</sup>; Dorothy Farrar-Edwards<sup>43</sup>; Ali Gharavi<sup>3</sup>; David B. Goldstein<sup>3</sup>; Philip Greenland<sup>18</sup>; William Hogan<sup>44</sup>; George Hripcsak<sup>3</sup>; Priscilla Igho-Pemu<sup>45</sup>; Christine C. Johnson<sup>22</sup>; Rainu Kaushal<sup>46</sup>; Elizabeth W Karlson<sup>5</sup>; Bruce Korf<sup>24</sup>; Cora E Lewis<sup>24</sup>; Oscar Marroquin<sup>32</sup>; Shawn Murphy<sup>5</sup>; George O'Connor<sup>47</sup>; Christopher J. O'Donnell<sup>27</sup>; Lucila Ohno-Machado<sup>28</sup>; Akinlolu Ojo<sup>30</sup>; Margaret A. Pericak-Vance<sup>40</sup>; Eric Reiman<sup>30</sup>; Steven E. Reis<sup>32</sup>; M. Elizabeth Ross<sup>46</sup>; Elizabeth Shenkman<sup>44</sup>; Jordan W Smoller<sup>5</sup>; Andreas Theodorou<sup>30</sup>; Rhonda K Trousdale<sup>48</sup>; Phil Tsao<sup>27</sup>; Shyam Visweswaran<sup>32</sup>; Scott Weiss<sup>5</sup>; Jeffrey Whittle<sup>49</sup>; Robert Winn<sup>13</sup>; Stephan Zuchner<sup>40</sup>; Michael E. Zwick<sup>50</sup>; *Federally Qualified Health Centers:* Veena Channamsetty<sup>11</sup>; Carmen Chinae<sup>12</sup>; Ayanna Jenkins<sup>21</sup>; Nancy Jenks<sup>12</sup>; Parinda Khatri<sup>23</sup>; Fatima Munoz<sup>26</sup>; Debra Rice<sup>21</sup>; Eric Schlueter<sup>33</sup>; Gregory Talavera<sup>26</sup>; Amy Taylor<sup>11</sup>; Febe Wallace<sup>23</sup>; Joyce Winkler<sup>33</sup>; *Data and Research Center:* Joshua C. Denny<sup>1</sup>; David Glazer<sup>16</sup>; Sekar Kathiresan<sup>4</sup>; *Biobank:* Mine Cicek<sup>36</sup>; Steve Thibodeau<sup>36</sup>; *The Participant Center:* Eric Topol<sup>34</sup>; *The Participant Technology Systems Center:* Praduman Jain<sup>20</sup>; *Communications and Engagement:* Patrick McGovern<sup>10</sup>; Ronnie Tepp<sup>35</sup>; *Community Partners:* Adolph Falcón<sup>14</sup>; Gretchen Funk<sup>15</sup>; Patricia Watkins Lattimore<sup>37</sup>; Mitchell R Lunn<sup>25</sup>; Edgar Gil Rico<sup>14</sup>; *Genome Centers:* Evan E. Eichler<sup>29</sup>; Stacey Gabriel<sup>4</sup>; Eric Boerwinkle<sup>6</sup>; Kimberly Doheny<sup>51</sup>; Richard Gibbs<sup>47</sup>; Gail P Jarvik<sup>29</sup>; Deborah A Nickerson<sup>29</sup>; Heidi L. Rehm<sup>4</sup>; Scott Topper<sup>4</sup>

**Committee and Working Group Chairs:** *Access, Privacy and Security:* Brad Malin<sup>1</sup>; Rex Chisholm<sup>18</sup>; *Consent:* John Chaffins<sup>10</sup>; John Wilbanks<sup>50</sup>; *Data Privacy and Security:* Brad Malin<sup>1</sup>; *Electronic Health Records:* George Hripcsak<sup>3</sup>; Abel Kho<sup>18</sup>; *Omics:* Sekar Kathiresan<sup>4</sup>; *Engagement & Communication:* Karriem Watson<sup>13</sup>; Usha Menon<sup>30</sup>; Consuelo Wilkins<sup>1</sup>; *Participant Provided Information:* Brian Ahmedani<sup>22</sup>; Rob Cronin<sup>1</sup>; Chris O'Donnell<sup>27</sup>; Paul

Harris<sup>1</sup>; *Physical Measurements and Biospecimens*: Steve Steinhubl<sup>34</sup>; Steve Thibodeau<sup>36</sup>; *Protocol Integration*: Akinlolu Ojo<sup>30</sup>; Sekar Kathiresan<sup>4</sup>; *Publications, Access, and Guidelines*: Rex Chisholm<sup>18</sup>; Dennis McNamara<sup>32</sup>; *Return of Value*: Stephen Mikita<sup>9</sup>; Robert Green<sup>5</sup>; Amy Taylor<sup>11</sup>; *Science*: Jordan W Smoller<sup>5</sup>; Mona Fouad<sup>24</sup>; *Special Populations*: Raj C. Shah<sup>50</sup>; Steve Mikita<sup>9</sup>

**NIH All of Us Research Program Staff**: Kate Blizinsky<sup>2</sup>; Mark Caulder<sup>2</sup>; Alyssa Cotler<sup>2</sup>; Stephanie Devaney<sup>2</sup>; Eric Dishman<sup>2</sup>; Stephanie Fowler<sup>2</sup>; Holly Garriock<sup>2</sup>; Kelly Gebo<sup>2</sup>; Gwynne Jenkins<sup>2</sup>; Maria Lopez-Class<sup>2</sup>; Chris Lunt<sup>2</sup>; James McClain<sup>2</sup>; Brad Ozenberger<sup>2</sup>; Dara Richardson-Heron<sup>2</sup>; Edward Ramos<sup>2</sup>; Joni L Rutter<sup>2</sup>

**Other Key Contributors, by Awardee:**

**Biobank**: John Maragos<sup>36</sup>

**Community Partners**: *Asian Health Coalition*: Manasi Jayaprakash<sup>31</sup>; Emily Koebnick<sup>31</sup>; Helen Lam<sup>31</sup>; Chieko Maene<sup>31</sup>; Jennifer Oh<sup>31</sup>; Amy Wang<sup>31</sup>; *SGM Community Engagement Partner*: Mahri Bahati<sup>25</sup>; Kirsten Bibbins-Domingo<sup>25</sup>; Carolyn Hunt<sup>25</sup>; Micah Lubensky<sup>25</sup>; Juno Obedin-Maliver<sup>25</sup>

**Data and Research Center**: Regina Andrade<sup>1</sup>; Melissa Basford<sup>1</sup>; Dikshya Bastakoty<sup>1</sup>; Robert Carroll<sup>1</sup>; Brandy Mapes<sup>1</sup>; Kelsey Mayo<sup>1</sup>; David Mohs<sup>4</sup>; Karthik N Muthuraman<sup>16</sup>; Karthik Natarajan<sup>3</sup>; Andrea Ramirez<sup>1</sup>; Jon Scherdin<sup>1</sup>; Scott Sutherland<sup>20</sup>; Keri Wolfe<sup>1</sup>

**Federally Qualified Health Centers**: Elizabeth Lugo-Butler<sup>26</sup>; Migdaliz Soto<sup>11</sup>

**Genome Centers**: *Baylor Hopkins Center for Clinical Genomics*: Ginger Metcalf<sup>52</sup>; Donna M. Muzny<sup>52</sup>; *The Broad-LMM-Color Genome Center*: Cynthia Neben<sup>4</sup>; Alicia Zhou<sup>4</sup>; *Northwest Genomics Center*: Colleen P Davis<sup>29</sup>; Chris Frazar<sup>29</sup>; Christina M Lockwood<sup>29</sup>; Colin C Pritchard<sup>29</sup>; Brian H Shirts<sup>29</sup>; Joshua D Smith<sup>29</sup>

**The Participant Center**: Katie Baca-Motes<sup>34</sup>; Erin Coughlin<sup>34</sup>; Nick D'Addezio<sup>53</sup>; Meg Doerr<sup>50</sup>; Ben Greenberg<sup>34</sup>; Dina Hamideh<sup>34</sup>; Katie Harris<sup>34</sup>; Tanya Hearne<sup>34</sup>; Paula King<sup>34</sup>; Andrew LeBlanc<sup>34</sup>; Lara Mangravite<sup>50</sup>; Julia Moore-Vogel<sup>34</sup>; Danny Oran<sup>34</sup>; Greg Orr<sup>19</sup>; Melissa Peters<sup>34</sup>; Giorgio Quer<sup>34</sup>; Mercedita Roxas-Murray<sup>54</sup>; Gayle Simon<sup>34</sup>; Christine Suver<sup>50</sup>; Janet Villa<sup>38</sup>; Laurie Wyatt<sup>55</sup>

**The Participant Technology Systems Center**: Jason Cao<sup>20</sup>; Meghan Bauman<sup>20</sup>; Mark Begale<sup>20</sup>; Neeta Jain<sup>20</sup>; Dave Klein<sup>20</sup>; Josh Schilling<sup>20</sup>; Scott Sutherland<sup>20</sup>; Chris Warfield<sup>20</sup>

**Regional Medical Centers**: *All of Us New England*: William Adams<sup>47</sup>; Nicole Allen<sup>5</sup>; Tracy Battaglia<sup>47</sup>; Natalie Boutin<sup>5</sup>; Natalie Butler<sup>47</sup>; Cheryl Clark<sup>56</sup>; Julien Dedier<sup>47</sup>; Susan Edgman-Levitan<sup>57</sup>; Robert Green<sup>56</sup>; Jonathan Jackson<sup>5</sup>; Cheryl McCloud<sup>47</sup>; Ashley Mici<sup>56</sup>; Nyryan Nolido<sup>56</sup>; Penny Price<sup>47</sup>; Carolina Stamoulos<sup>47</sup>; Stephen Tringale<sup>47</sup>; Dean Xerras<sup>57</sup>; *All of Us Wisconsin*: Tricia Denman<sup>43</sup>; Kristyn Ertl<sup>49</sup>; Mackenzie Francisco<sup>7</sup>; Zeno Franco<sup>49</sup>; Gina Green-

Harris<sup>43</sup>; Jennifer Koney<sup>49</sup>; Lisa Kunst<sup>7</sup>; Dessie Levy<sup>49</sup>; Sarah Longenecker<sup>49</sup>; Marje Murray<sup>43</sup>; David Nelson<sup>49</sup>; Peggy Peissig<sup>7</sup>; Rob Strenn<sup>7</sup>; Umberto Tachanardi<sup>43</sup>; Brad Taylor<sup>49</sup>; Gil White<sup>58</sup>; *California Precision Medicine Consortium*: Alexander Borowsky<sup>59</sup>; John Billimek<sup>42</sup>; Steven Chessler<sup>42</sup>; Emily Dow<sup>42</sup>; Rob E. El-Kareh<sup>28</sup>; Marc Goodman<sup>60</sup>; Robert Hiatt<sup>61</sup>; Michael A. Hogarth<sup>28</sup>; Katherine Kim<sup>59</sup>; Elena Martinez<sup>28</sup>; Daniella Meeker<sup>62</sup>; Ryan J. Moran<sup>28</sup>; Hannah Park<sup>42</sup>; Siddharth Singh<sup>28</sup>; Amy M. Sitapati<sup>28</sup>; Spencer Soohoo<sup>60</sup>; Kai Zheng<sup>42</sup>; Argyrios Ziogas<sup>42</sup>; *Illinois Precision Medicine Consortium*: Maria Argos<sup>13</sup>; Brisa Aschebrook-Kilfoy<sup>41</sup>; Marcelo Bento Soares<sup>63</sup>; Pablo V. Gejman<sup>64</sup>; Suzanne Hambright<sup>13</sup>; Joyce Ho<sup>18</sup>; Karen E Kim<sup>41</sup>; Alan R. Sanders<sup>64</sup>; David J. Sedillo<sup>65</sup>; Elizabeth Stepniak<sup>41</sup>; *New York City Precision Medicine Consortium*: Louise Bier<sup>3</sup>; Jekolbi Brown<sup>48</sup>; Elizabeth Cohn<sup>3</sup>; Catherine Freeland<sup>3</sup>; Kelly Williams<sup>46</sup>; *SouthEast Enrollment Center*: Lisa Abreu<sup>40</sup>; Alvaro Alonso<sup>50</sup>; Chadrick Anderson<sup>66</sup>; Cindy Delgado<sup>40</sup>; Nita N. Deshpande<sup>50</sup>; Eileen Handberg<sup>44</sup>; Rosario Isasi<sup>40</sup>; Theodore M. Johnson II<sup>50</sup>; H. Richard Johnston<sup>50</sup>; Greg S. Martin<sup>50</sup>; Atuarra McCaslin<sup>45</sup>; Jacob McCauley<sup>40</sup>; Robert Meller<sup>45</sup>; Howard Mosby<sup>66</sup>; Elizabeth Olorundare<sup>45</sup>; Andrew R. Post<sup>50</sup>; Alexander Quarshie<sup>45</sup>; Arshed A. Quyyumi<sup>50</sup>; Tracie C. Rosser<sup>50</sup>; Brittney Roth<sup>44</sup>; Sonya White<sup>44</sup>; *Southern Network*: Aras Acemgil<sup>67</sup>; Errol Crook<sup>68</sup>; James Cimino<sup>24</sup>; Vivian Fonseca<sup>69</sup>; Jewell Halanych<sup>24</sup>; Shaila Handattu<sup>24</sup>; John Higginbotham<sup>70</sup>; Kathy King<sup>24</sup>; Sara Knight<sup>24</sup>; Tiffani Maycock<sup>24</sup>; Lucio Miele<sup>71</sup>; Allen Perkins<sup>68</sup>; Sandra Roberts<sup>24</sup>; Julie Schach<sup>24</sup>; Roger Smalligan<sup>24</sup>; Richard Summers<sup>72</sup>; Stephanie Tanner<sup>72</sup>; Thomas Weida<sup>70</sup>; *Trans-American Consortium for the Health Care Systems Research Network*: Jodi Bohnhorst<sup>73</sup>; David Chesla<sup>73</sup>; Mara Epstein<sup>74</sup>; Giovanni Fillardo<sup>75</sup>; Larry Garber<sup>74</sup>; Christine Joseph<sup>22</sup>; Karen Kippen<sup>22</sup>; Kathleen Mazor<sup>74</sup>; Daniel McLaren<sup>22</sup>; Cathryn Peltz<sup>22</sup>; Teresa Phan<sup>75</sup>; Allise Taran<sup>76</sup>; Steve Waring<sup>76</sup>; Joann Wagner<sup>74</sup>; Renee Williams<sup>22</sup>; *University of Arizona*: Elizabeth Calhoun<sup>30</sup>; Titi Ilori<sup>30</sup>; Jason Karnes<sup>30</sup>; Francisco Moreno<sup>30</sup>; Tammy Ojo<sup>30</sup>; Rachele Peterson<sup>30</sup>; Cecilia Rosales<sup>30</sup>; Amanda Sokan<sup>30</sup>; *University of Pittsburgh*: Becky Baldwin<sup>32</sup>; Philip Empey<sup>32</sup>; Michelle Labrinidis<sup>32</sup>; Kristin Lazzara<sup>32</sup>; Mylynda Massart<sup>32</sup>; David Mathias<sup>32</sup>; Margaret Palumbo<sup>32</sup>; Laurel Yasko<sup>32</sup>; William Young<sup>32</sup>

**U.S. Department of Veterans Affairs:** Lori Churby<sup>27</sup>; Rona Relova<sup>27</sup>; Sherilyn Sawyer<sup>27</sup>; Fatima Shahzad<sup>27</sup>

**Leidos:** Brian L Florence<sup>77</sup>; Heather M Sansbury<sup>77</sup>; Peter Scully<sup>77</sup>; Isabelle Bisceglia<sup>77</sup>

**Affiliations:** <sup>1</sup>Vanderbilt University; <sup>2</sup>National Institutes of Health; <sup>3</sup>Columbia University Irving Medical Center; <sup>4</sup>Broad Institute; <sup>5</sup>Partners Healthcare System; <sup>6</sup>Baylor University; <sup>7</sup>Marshfield Clinic Research Institute; <sup>8</sup>Abyssinian Baptist Church; <sup>9</sup>All of Us Research Program; <sup>10</sup>Hungry Heart Media, Inc. (Wondros); <sup>11</sup>Community Health Center; <sup>12</sup>HRHCare; <sup>13</sup>University of Illinois at Chicago; <sup>14</sup>National Alliance for Hispanic Health; <sup>15</sup>FiftyForward; <sup>16</sup>Verily Life Sciences; <sup>17</sup>The MITRE Corporation; <sup>18</sup>Northwestern University; <sup>19</sup>Walgreens; <sup>20</sup>Vibrent Health; <sup>21</sup>Jackson-Hinds Comprehensive Health Center; <sup>22</sup>Henry Ford Health System; <sup>23</sup>Cherokee Health Systems; <sup>24</sup>University of Alabama at Birmingham; <sup>25</sup>Stanford University School of Medicine; <sup>26</sup>San Ysidro Health; <sup>27</sup>U.S. Department of Veterans Affairs; <sup>28</sup>University of California, San Diego; <sup>29</sup>University of Washington; <sup>30</sup>University of Arizona; <sup>31</sup>Asian Health Coalition; <sup>32</sup>University of Pittsburgh; <sup>33</sup>Cooperative Health (formerly known as Eau Claire Cooperative Health Center); <sup>34</sup>Scripps

Research Institute; <sup>35</sup>HCM Strategists LLC; <sup>36</sup>Mayo Clinic; <sup>37</sup>Delta Research and Educational Foundation; <sup>38</sup>San Diego Blood Bank; <sup>39</sup>National Library of Medicine; <sup>40</sup>University of Miami School of Medicine; <sup>41</sup>University of Chicago; <sup>42</sup>University of California, Irvine; <sup>43</sup>University of Wisconsin-Madison; <sup>44</sup>University of Florida; <sup>45</sup>Morehouse School of Medicine; <sup>46</sup>Weill Cornell Medical College; <sup>47</sup>Boston Medical Center Corporation; <sup>48</sup>NYC Health + Hospitals/Harlem ; <sup>49</sup>Medical College of Wisconsin; <sup>50</sup>Emory University; <sup>51</sup>Johns Hopkins University School of Medicine; <sup>52</sup>Baylor College of Medicine; <sup>53</sup>Blue Cross Blue Shield Association; <sup>54</sup>Montage Marketing Group; <sup>55</sup>DXC Technology; <sup>56</sup>Brigham and Women's Hospital; <sup>57</sup>Massachusetts General Hospital; <sup>58</sup>BloodCenter of Wisconsin; <sup>59</sup>University of California, Davis; <sup>60</sup>Cedars-Sinai Medical Center; <sup>61</sup>University of California, San Francisco; <sup>62</sup>University of Southern California; <sup>63</sup>University of Illinois College of Medicine at Peoria; <sup>64</sup>NorthShore University HealthSystem; <sup>65</sup>Rush University Medical School; <sup>66</sup>Grady Health System; <sup>67</sup>University of Alabama in Huntsville; <sup>68</sup>University of South Alabama; <sup>69</sup>Tulane University; <sup>70</sup>University of Alabama, Tuscaloosa; <sup>71</sup>Louisiana State University; <sup>72</sup>University of Mississippi Medical Center; <sup>73</sup>Spectrum Health System; <sup>74</sup>University of Massachusetts/ Reliant Medical Group; <sup>75</sup>Baylor Scott and White Health System; <sup>76</sup>Essentia Health System; <sup>77</sup>Leidos

## **Funding sources**

*All of Us* is supported by grants through the National Institutes of Health Office of the Director: *Regional Medical Centers*: 1 OT2 OD026549; 1 OT2 OD026554; 1 OT2 OD026557; 1 OT2 OD026556; 1 OT2 OD026550; 1 OT2 OD 026552; 1 OT2 OD026553; 1 OT2 OD026548; 1 OT2 OD026551; 1 OT2 OD026555; IAA #: AOD 16037; *Federally Qualified Health Centers*: HHSN 263201600085U; *Data and Research Center*: 5 U2C OD023196; *Biobank*: 1 U24 OD023121; *The Participant Center*: U24 OD023176; *Participant Technology Systems Center*: 1 U24 OD023163; *Communications and Engagement*: 3 OT2 OD023205; 3 OT2 OD023206; *Community Partners*: 1 OT2 OD025277; 3 OT2 OD025315; 1 OT2 OD025337; 1 OT2 OD025276; and the *All of Us Pilot*: 1 OT2 OD023132.

**Table S1: Estimated baseline prevalences and incidences of disease conditions in one million people.**

These data are taken from the Precision Medicine Initiative (PMI) Working Group Report to the Advisory Committee to the Director and were derived from individuals volunteering to large-scale EHR biobanks in the NHGRI Electronic Medical Records and Genomics (eMERGE) Network.<sup>1</sup> As these case estimates derived from longitudinally followed patients at large academic healthcare systems, they may represent sicker populations than enrolling in *All of Us*.

| Disease                    | Estimated prevalent cases | Estimated incident cases |          | Total in 10 years |
|----------------------------|---------------------------|--------------------------|----------|-------------------|
|                            |                           | 5 years                  | 10 years |                   |
| Essential hypertension     | 360,794                   | 99,963                   | 231,165  | 591,959           |
| Type 2 Diabetes            | 135,658                   | 40,411                   | 94,493   | 230,151           |
| Depression                 | 110,091                   | 40,133                   | 91,893   | 201,984           |
| Atrial fibrillation        | 78,272                    | 35,047                   | 56,292   | 134,564           |
| Chronic renal failure      | 74,700                    | 28,944                   | 49,926   | 124,626           |
| Congestive heart failure   | 73,723                    | 21,315                   | 40,322   | 114,045           |
| Asthma                     | 62,149                    | 17,292                   | 44,036   | 106,185           |
| COPD                       | 48,728                    | 15,396                   | 33,584   | 82,312            |
| Rheumatoid arthritis       | 45,835                    | 11,466                   | 23,875   | 69,710            |
| Myocardial infarction      | 39,273                    | 14,981                   | 27,112   | 66,385            |
| Epilepsy                   | 33,426                    | 4,161                    | 11,248   | 44,674            |
| Thrombosis                 | 26,746                    | 11,559                   | 21,169   | 47,915            |
| Breast cancer (female)     | 20,470                    | 12,068                   | 21,382   | 41,852            |
| Stroke                     | 16,016                    | 8,969                    | 15,598   | 31,614            |
| Lupus                      | 14,659                    | 3,283                    | 6,738    | 21,397            |
| Prostate cancer            | 13,861                    | 6,241                    | 13,848   | 27,709            |
| Dementia                   | 13,373                    | 7,028                    | 9,656    | 23,029            |
| Lung cancer                | 11,432                    | 2,866                    | 4,828    | 16,260            |
| Colorectal cancer          | 9,407                     | 3,745                    | 6,844    | 16,251            |
| Abdominal aortic aneurysms | 8,729                     | 2,451                    | 5,518    | 14,247            |
| Melanoma                   | 6,109                     | 2,727                    | 3,873    | 9,982             |
| Parkinson's disease        | 4,311                     | 2,127                    | 4,032    | 8,343             |

<sup>1</sup>Precision Medicine Initiative (PMI) Working Group Report to the Advisory Committee to the Director. The Precision Medicine Initiative Cohort Program – Building a Research Foundation for 21st Century Medicine [Internet]. 2015 [cited 2019 May 31]; Available from: <http://www.nih.gov/precisionmedicine/09172015-pmi-working-group-report.pdf>.



**Table S2: List of Healthcare Provider Organizations as of 2019.**

**Regional Medical Centers**

- U.S. Department of Veterans Affairs Medical Centers
- *All of Us* Wisconsin
  - Marshfield Clinic Research Institute
  - BloodCenter of Wisconsin, Milwaukee
  - Medical College of Wisconsin, Milwaukee
  - University of Wisconsin School of Medicine and Public Health in Madison
- California Precision Medicine Consortium
  - University of California San Diego (lead)
  - Cedars-Sinai Medical Center, Los Angeles
  - San Diego Blood Bank
  - University of California, Davis
  - University of California, Irvine
  - University of California, San Francisco
  - University of Southern California, Los Angeles
- Illinois Precision Medicine Consortium
  - Northwestern University, Chicago
  - University of Chicago
  - University of Illinois at Chicago
  - NorthShore University HealthSystem, Chicago
  - Rush University Medical Center, Chicago
- *All of Us* New England
  - Partners HealthCare System (lead) and its founding hospitals, Brigham and Women's Hospital and Massachusetts General Hospital
  - Boston Medical Center
  - Newton-Wellesley Hospital
  - Faulkner Hospital
  - McLean Hospital
- New York City Precision Medicine Consortium
  - Columbia University Medical Center, New York City (lead)
  - NYC Health + Hospitals/Harlem, New York City
  - NewYork-Presbyterian, New York City
  - Weill Cornell Medicine, New York City
- Southern *All of Us* Network
  - University of Alabama at Birmingham (UAB)
  - Cooper Green Mercy Health Services, Birmingham, Alabama
  - Huntsville Hospital, Alabama
  - Louisiana State University Health Sciences Center, New Orleans
  - Tulane Medical Center, New Orleans
  - Tuskegee University, Alabama
  - UAB Hospital, Birmingham, Alabama

- UAB School of Medicine's Montgomery Internal Medicine and Selma Family Medicine programs, Birmingham, Alabama
- University of Mississippi Medical Center, Jackson
- University of South Alabama Health System, Mobile
- University Medical Center, Tuscaloosa, Alabama
- SouthEast Enrollment Center
  - University of Miami Miller School of Medicine, Florida
  - Emory University, Atlanta
  - Morehouse School of Medicine, Atlanta
  - OneFlorida Clinical Research Consortium led by the University of Florida in Gainesville
- Trans-American Consortium for the Health Care Systems Research Network
  - Henry Ford Health System, Detroit (lead)
  - Baylor Scott and White Health, Dallas
  - Spectrum Health, Grand Rapids, Michigan
  - Essentia Institute of Rural Health, Minnesota
  - Reliant Medical Group/University of Massachusetts, Massachusetts
- University of Arizona, Tucson
  - Banner Health, Phoenix
- *All of Us* Pennsylvania
  - University of Pittsburgh / University of Pittsburgh Medical Center, Pittsburgh
  - Temple University, Philadelphia

### **Federally Qualified Health Centers**

- Cherokee Health Systems, Knoxville, Tennessee
- Community Health Center, Inc., Middletown, Connecticut
- Eau Claire Cooperative Health Center, Columbia, South Carolina
- HRHCare, Peekskill, New York
- Jackson-Hinds Comprehensive Health Center, Jackson, Mississippi
- San Ysidro Health, San Ysidro, California

**Table S3: Initial sample collection protocols.**

The samples collected will continue to evolve, and we expect we may collect additional samples in the future. The protocol and samples collected are available at <http://researchallofus.org>.

Initial sample collection protocol during Beta:

| Type of sample and collection tube | Volume collected (mL) | Fraction                                            |
|------------------------------------|-----------------------|-----------------------------------------------------|
| Blood                              |                       |                                                     |
| Clot activator (SST)               | 8.5                   | Serum                                               |
| Plasma separator (PST)             | 8                     | Plasma                                              |
| Na-heparin                         | 4                     | Whole blood (+DMSO)                                 |
| EDTA                               | 4                     | DNA                                                 |
| EDTA x 2                           | 10                    | (10ml) Plasma<br>(2ml) WBC<br>(4ml) RBC (+glycerol) |
| Urine                              | 10                    |                                                     |
| Saliva (backup)                    | 2                     | DNA                                                 |

Current sample collection protocol:

| Type of sample and collection tube | Volume collected (mL) | Fraction                                           |
|------------------------------------|-----------------------|----------------------------------------------------|
| Blood                              |                       |                                                    |
| Clot activator (SST)               | 8.5                   | Serum                                              |
| Plasma separator (PST)             | 8                     | Plasma                                             |
| Na-heparin                         | 4                     | Whole blood (+DMSO)                                |
| EDTA                               | 4                     | DNA                                                |
| EDTA                               | 10                    | (5ml) Plasma<br>(1ml) WBC<br>(2ml) RBC (+glycerol) |
| cf DNA                             | 9                     | Plasma                                             |
| PAXgene (RNA)                      | 2.5                   | RNA                                                |
| Urine                              | 10                    |                                                    |
| Saliva (backup)                    | 2                     | DNA                                                |
